# Supplementary material for: Circulating Let-7 Family Members as Non-Invasive Biomarkers for Predicting Hepatocellular Carcinoma Risk after Antiviral Treatment among Chronic Hepatitis C Patients
Source: MDPI journal article supplement (doi:10.3390/cancers14082023), 2022-04-16
Supplement: s1 [file s1]

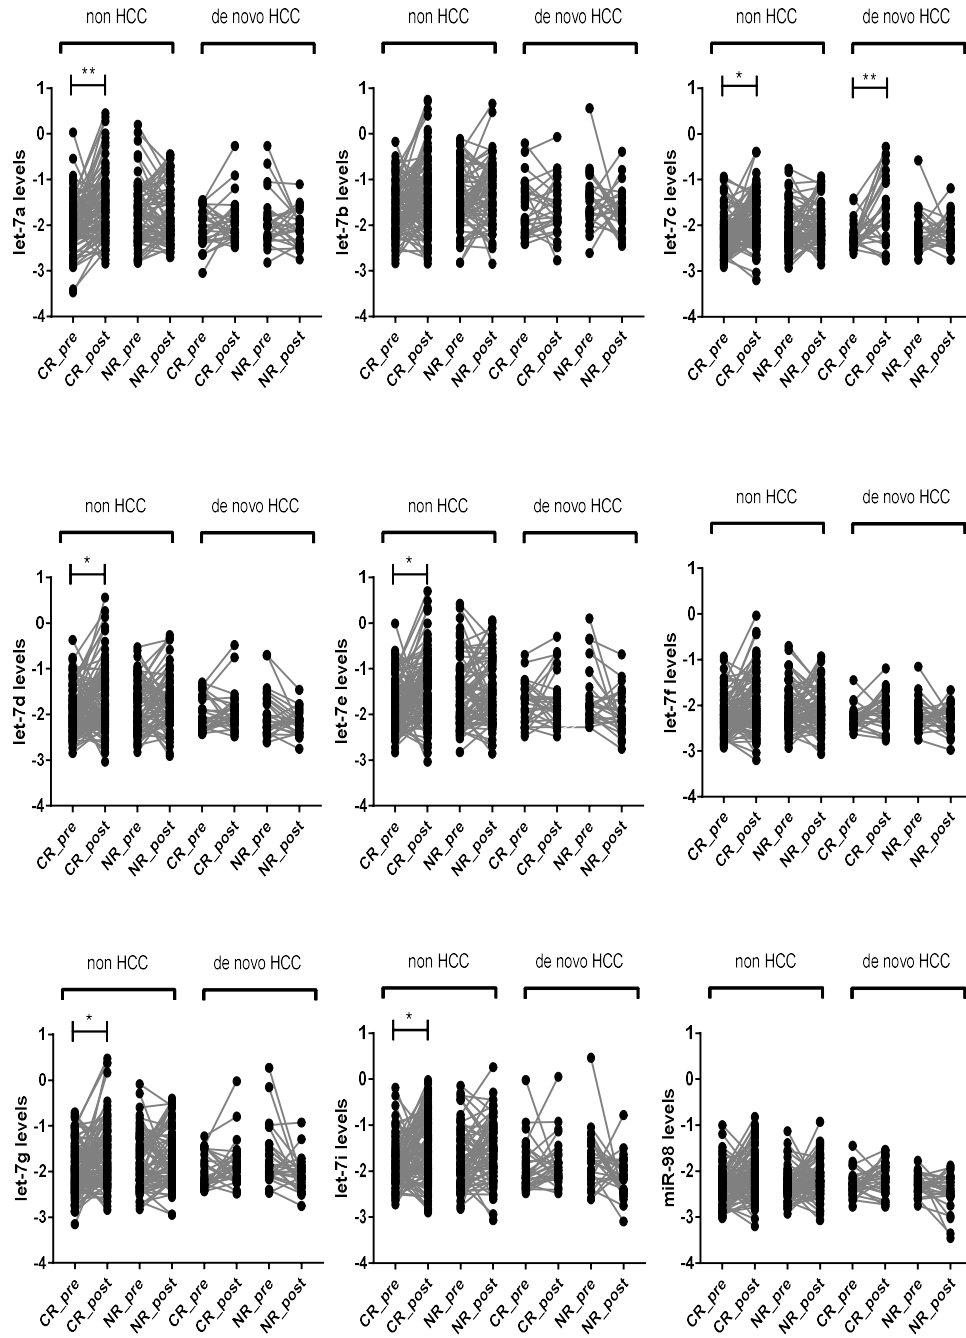

**Figure S1.** Scatter plots comparing the pre-treatment (baseline) and post-treatment (M6) circulating Let-7 family expression between SVR and non-SVR groups among the de novo HCC and non-HCC CHC patients. Let-7 levels based on  $\text{Log}_{10} 2^{-\Delta\text{Ct}} (\text{Ct}_{\text{target}} - \text{Ct}_{\text{cel39}})$  method. The *p*-value was represented by Dunn's multiple comparisons test.

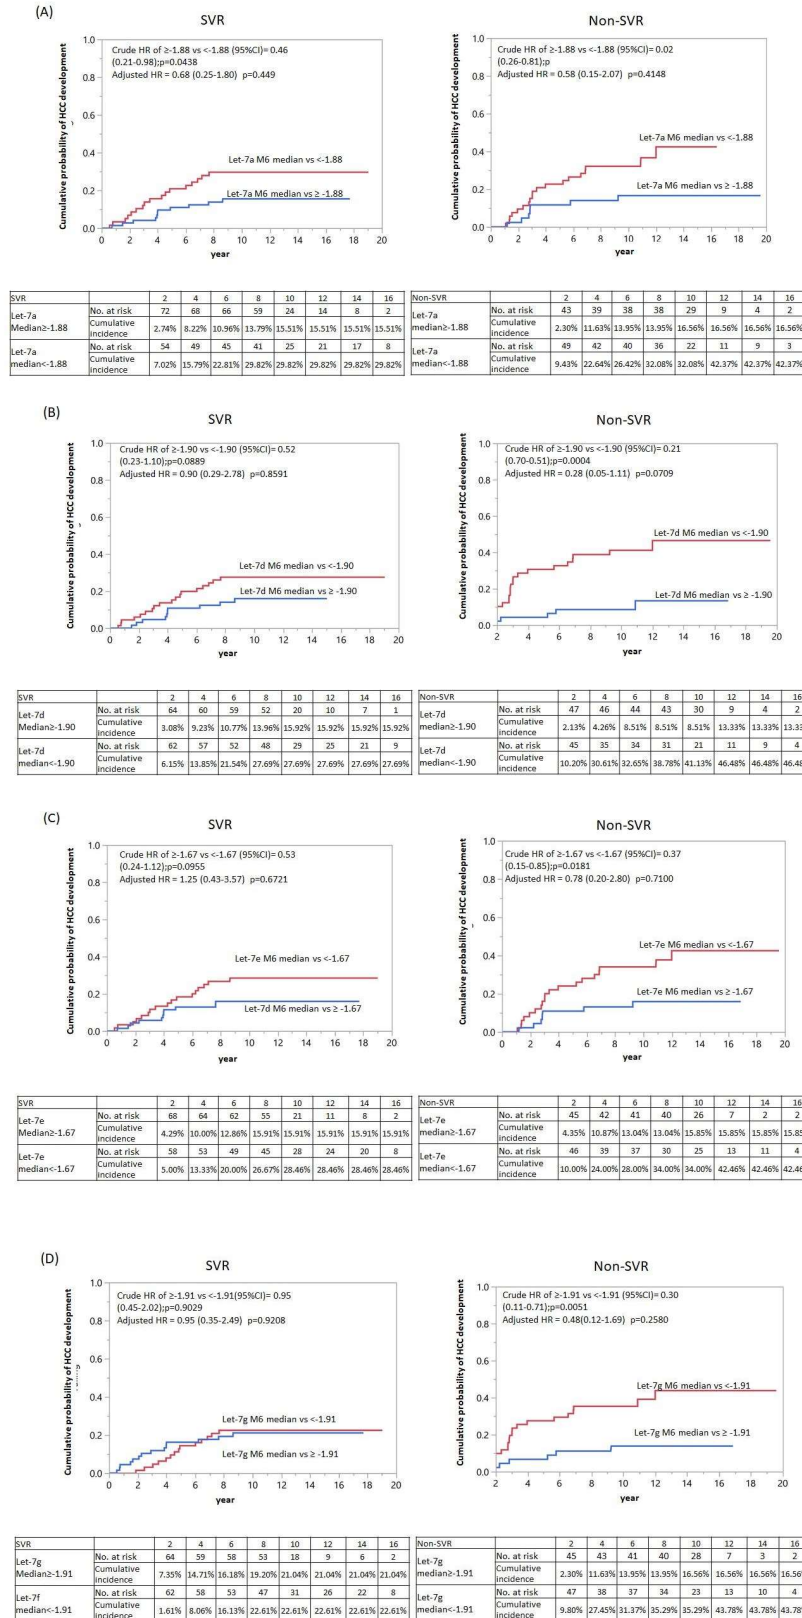

**Figure S2.** Kaplan-Meier survival analysis of let-7a, let-7d, let-7e, and let-7g (belong to Cluster 1) with HCC development in SVR and non-SVR group. Comparison of the cumulative probability of HCC development divided cut-off value from the median value of the distribution of Let-7 expression based on Log10  $2^{-\Delta\Delta Ct}$  method in (A) let-7a, (B) let-7d, (C) let-7e, and (D) let-7g. HR: Hazard ratio; CI: Confidence interval; HCC: Hepatocellular carcinoma.

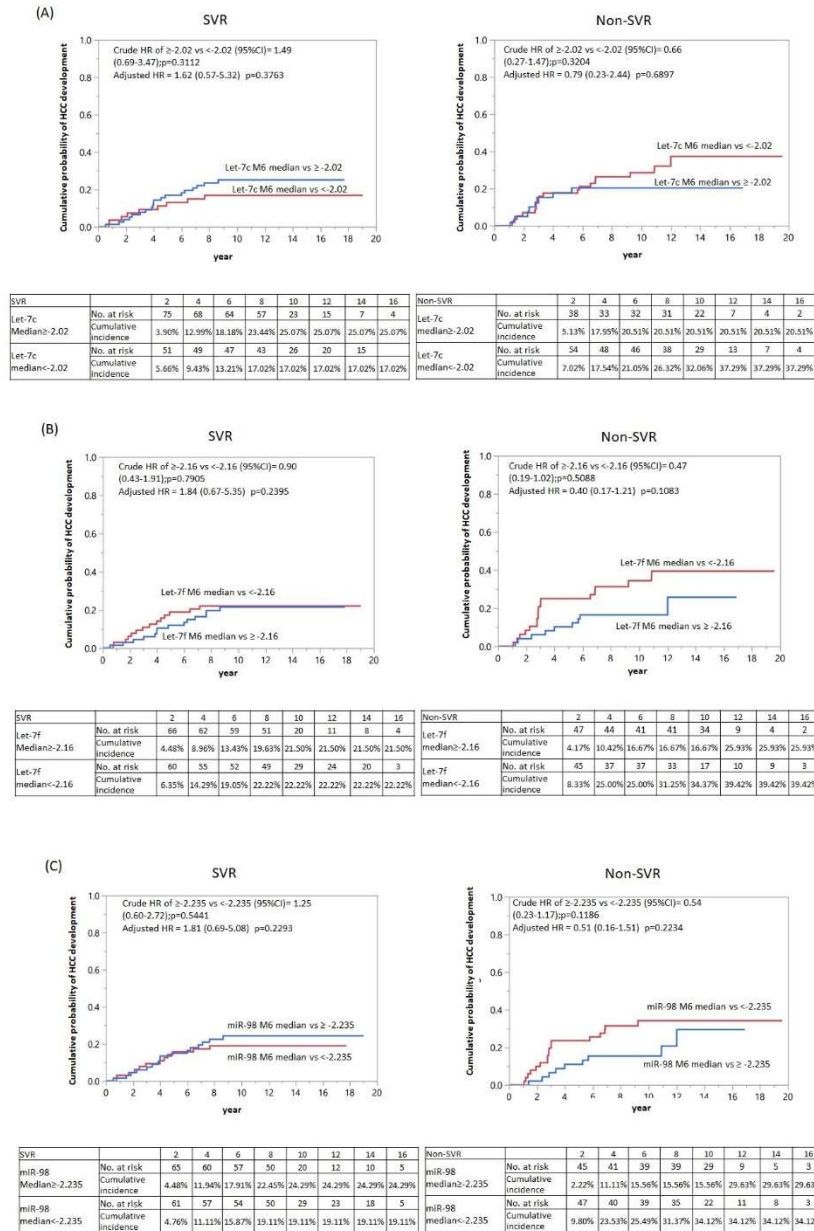

**Figure S3.** Kaplan-Meier survival analysis of let-7c, let-7f, and miR-98 (belong to Cluster 3) with HCC development in the SVR and non-SVR groups. Comparison of the cumulative probability of HCC development divided cut-off value from the median value of the distribution of Let-7 expression based on Log10  $2^{-\Delta\Delta Ct}$  method in (A) let-7c (B) let-7f, and (C) miR-98. HR: Hazard ratio; CI: Confidence interval; HCC: Hepatocellular carcinoma.

**Table S1.** De novo HCC patients ( $n = 54$ ) characteristics by BCLC stage.

| BCLC Stage | n  | %     | Age(yr) at HCC    | p-Value | Censored yr (Post M6 to HCC) | p-Value | Tumor Size (cm) | p-Value |
|------------|----|-------|-------------------|---------|------------------------------|---------|-----------------|---------|
| 0          | 14 | 25.93 | 60.10 $\pm$ 6.45  | rf      | 3.37 $\pm$ 2.25              | rf      | 1.55 $\pm$ 0.19 | rf      |
| A          | 23 | 42.59 | 61.05 $\pm$ 8.67  | ns      | 3.41 $\pm$ 2.00              | ns      | 2.76 $\pm$ 0.83 | <0.0001 |
| B          | 5  | 9.26  | 60.43 $\pm$ 13.26 | ns      | 5.64 $\pm$ 3.91              | ns      | 3.44 $\pm$ 1.12 | 0.0015  |
| C          | 12 | 22.22 | 67.89 $\pm$ 9.46  | 0.0253  | 5.81 $\pm$ 2.83              | 0.0288  | 4.82 $\pm$ 3.85 | 0.0493  |

Data are presented as the mean  $\pm$  SD. Statistical analysis was performed using Nonparametric multiple tests (BCLC stage 0 as reference). Tumor size was measured in centimeters (cm) from the largest diameter of the largest tumor. BCLC: Barcelona clinic liver cancer.

**Table S2.** Correlation coefficients were calculated for the let-7 family and the FIB-4 score of post-anti-viral treatment was stratified by a FIB-4 score of 3.25(M6).

| Log <sub>10</sub> 2 <sup>Δ</sup> -Delta Ct (M6) | FIB-4 Score <3.25       |           |           |          | FIB-4 Score ≥3.25       |           |           |          |
|-------------------------------------------------|-------------------------|-----------|-----------|----------|-------------------------|-----------|-----------|----------|
|                                                 | Correlation Coefficient | Lower 95% | Upper 95% | <i>p</i> | Correlation Coefficient | Lower 95% | Upper 95% | <i>p</i> |
| let7a                                           | -0.2609                 | -0.4139   | -0.0935   | 0.0026   | -0.1754                 | -0.4326   | 0.1083    | 0.2232   |
| let7b                                           | -0.2116                 | -0.3697   | -0.0416   | 0.0153   | -0.0983                 | -0.3666   | 0.1851    | 0.4971   |
| let7c                                           | -0.1415                 | -0.3056   | 0.0308    | 0.1069   | -0.0379                 | -0.3129   | 0.243     | 0.794    |
| let7d                                           | -0.3353                 | -0.4793   | -0.1738   | <.0001   | -0.0974                 | -0.3658   | 0.186     | 0.501    |
| let7e                                           | -0.2592                 | -0.4124   | -0.0918   | 0.0028   | -0.1721                 | -0.4298   | 0.1116    | 0.2321   |
| let7f                                           | -0.2296                 | -0.3859   | -0.0605   | 0.0083   | -0.1149                 | -0.3811   | 0.1689    | 0.4269   |
| let7g                                           | -0.2085                 | -0.3669   | -0.0383   | 0.0169   | -0.1654                 | -0.4242   | 0.1184    | 0.2509   |
| let7i                                           | -0.2181                 | -0.3756   | -0.0484   | 0.0123   | -0.1794                 | -0.436    | 0.1042    | 0.2126   |
| miR98                                           | -0.2742                 | -0.4257   | -0.1077   | 0.0015   | -0.0941                 | -0.3629   | 0.1892    | 0.5157   |

**Table S3.** Let-7 family associated with the development of HCC in the CHC patients with non-SVR after antiviral treatment (M6): Multivariate Cox proportional hazard regression model.

| Og <sub>10</sub> 2 <sup>Δ</sup> -Delta Ct |                                                        | Adjusted HR (95%CI) | <i>p</i> |
|-------------------------------------------|--------------------------------------------------------|---------------------|----------|
|                                           | M6 median: ≥-1.88 vs <-1.88                            | 0.58 (0.15–2.07)    | 0.4148   |
| Let7a                                     | Δ post(M6)-pre(baseline) median<br>≥0.18 vs <0.18      | 0.35 (0.07–1.23)    | 0.1069   |
| Let7b                                     | M6 median: ≥-1.44 vs <-1.44                            | 1.12 (0.33–3.71)    | 0.8513   |
|                                           | Δ post(M6)-pre(baseline) median<br>≥0.14 vs <0.14      | 1.20 (0.37–3.74)    | 0.7545   |
| Let7c                                     | M6 median: ≥-2.02 vs <-2.02                            | 0.79 (0.23–2.44)    | 0.6897   |
|                                           | Δ post(M6)-pre(baseline) median:<br>≥0.198 vs <0.198   | 1.20 (0.35–4.07)    | 0.7639   |
| Let7d                                     | M6 median: ≥-1.90 vs <-1.90                            | 0.28 (0.05–1.11)    | 0.0709   |
|                                           | Δ post(M6)-pre(baseline) median:<br>≥0.170 vs <0.170   | 0.88 (0.26–2.82)    | 0.8367   |
| Let7e                                     | M6 median: ≥-1.67 vs <-1.67                            | 0.78 (0.20–2.80)    | 0.7100   |
|                                           | Δ post(M6)-pre(baseline) median<br>≥0.150 vs <0.150    | 0.99 (0.24–3.49)    | 0.9885   |
| Let7f                                     | M6 median: ≥-2.16 vs <-2.16                            | 0.40 (0.17–1.21)    | 0.1083   |
|                                           | Δ post(M6)-pre(baseline) median:<br>≥0.0918 vs <0.0918 | 0.83 (0.24–2.70)    | 0.7557   |
| Let7g                                     | M6 median: ≥-1.91 vs <-1.91                            | 0.48 (0.12–1.69)    | 0.2580   |
|                                           | Δ post(M6)-pre(baseline) median:<br>≥0.12 vs <0.12     | 0.50 (0.11–1.59)    | 0.2560   |
| Let7i                                     | M6 median: ≥-1.696 vs <-1.696                          | 0.09(0.01–0.45)     | 0.0022 * |
|                                           | Δ post(M6)-pre(baseline) median:<br>≥0.177 vs <0.177   | 0.45 (0.10–1.55)    | 0.2153   |
| miR-98                                    | M6 median:<br>≥-2.235 vs <-2.235                       | 0.51(0.16–1.51)     | 0.2234   |
|                                           | Δ post(M6)-pre(baseline) median:<br>≥0.069 vs <0.069   | 0.67 (0.19–2.16)    | 0.5017   |
